# Supplementary material
Source: publisher site journal article supplement (https://www.dovepress.com/article/544019)
Supplement: Supplementary file 1 [file 544019%20Revised%20Supplementary%20Material.docx]

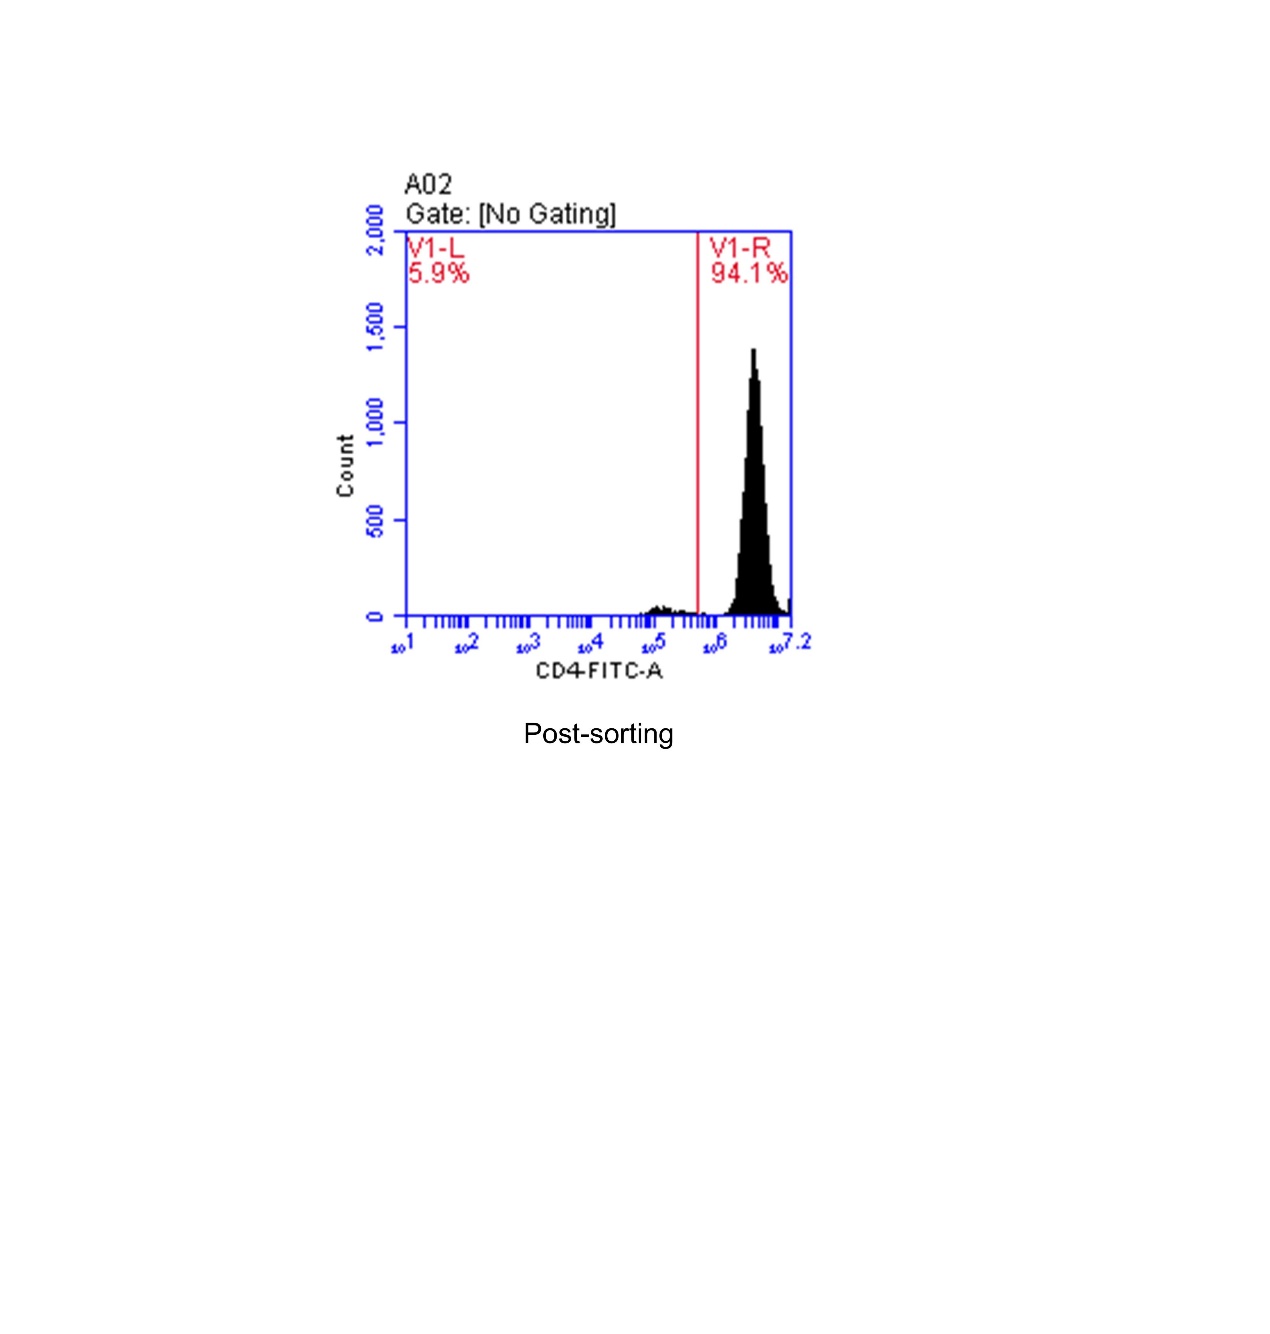


**Figure S1** Proportion of CD4 cells after magnetic bead sorting detected by flow cytometry


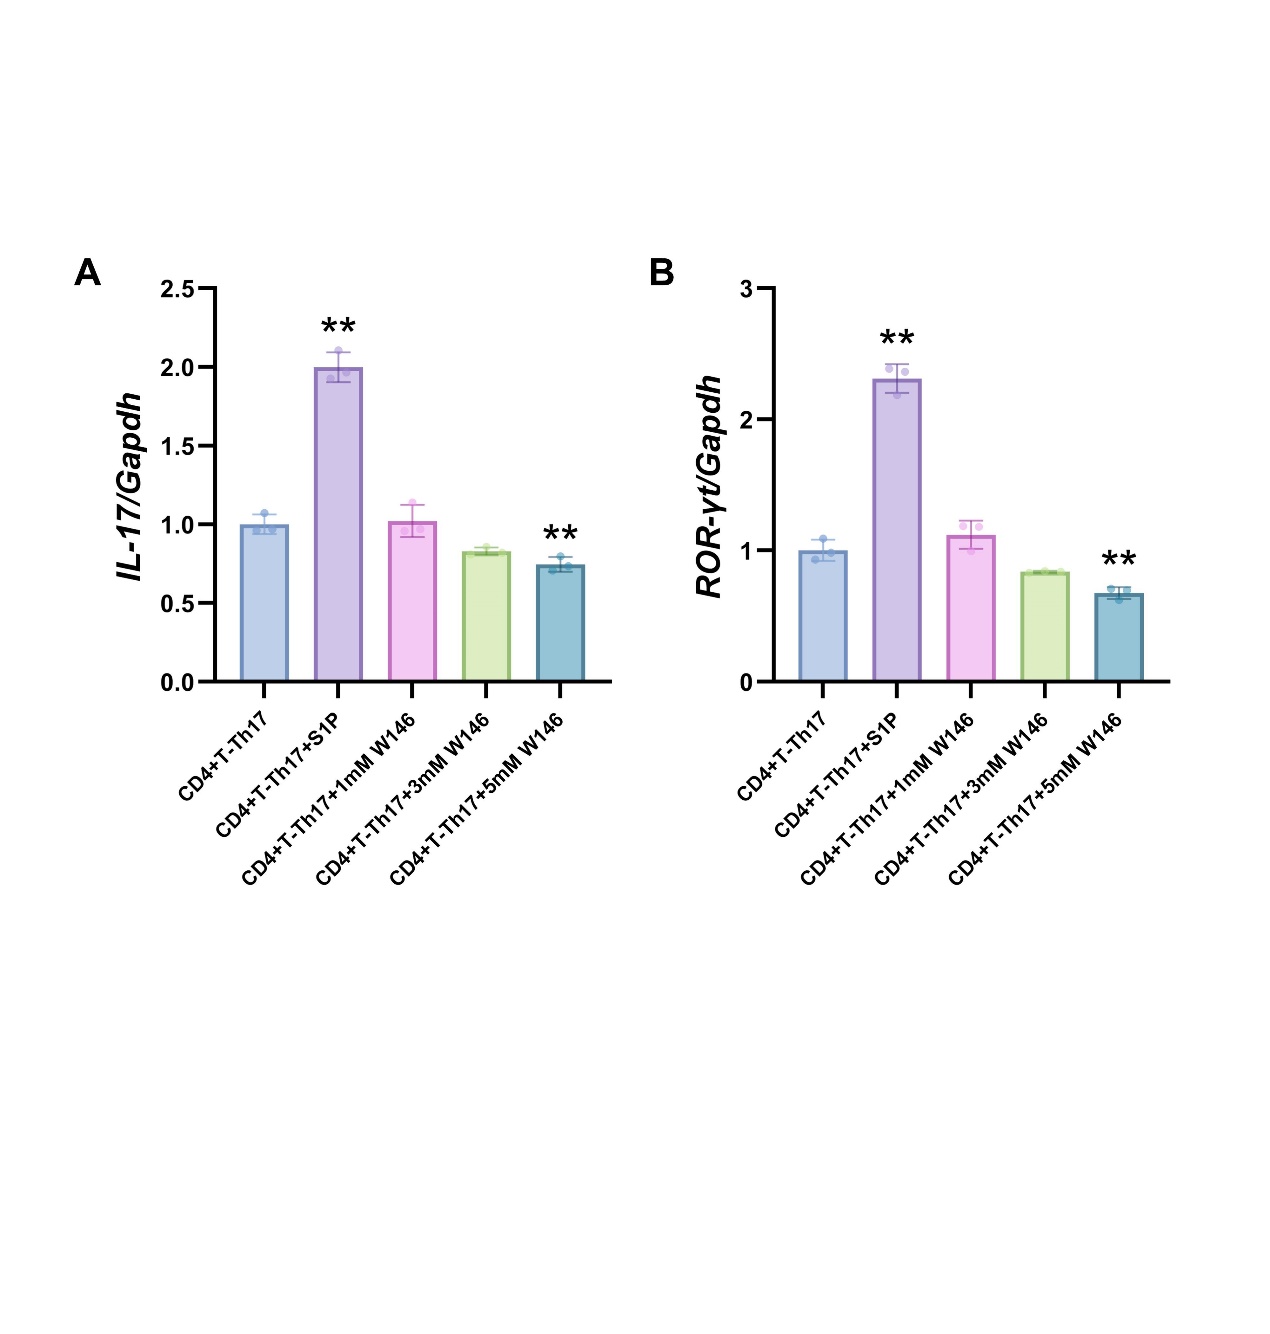


**Figure S2** W146 treatment reduces the mRNA expression of *Il7* and *Rorc* in Th17-polarized cells. The relative mRNA expression of **(A)** *Il7* and **(B)** *Rorc* was quantified by qRT-PCR in Th17-polarized CD4+ T cells after treatment with various concentrations of W146. Data are expressed as mean ± SD (n=3). ** P<0.01 vs Th17-CD4+T cell group.

**Table S1** Chemical compounds of QBY

| **Peak Number** | **Retention**  **Time (min)** | **Molecular Formula** | **Adduct Ion** | **Theoretical**  **Value (m/z)** | **Measured**  **Value (m/z)** | **Error (ppm)** | **Chemical**  **Compound Name** | **Source(Herb)** |
| --- | --- | --- | --- | --- | --- | --- | --- | --- |
| **1** | 1.14 | C24H42O21 | [M-H]- | 665.21458 | 665.21344 | -0.07 | Stachyose | Rehmanniae Radix |
| **2** | 1.14 | C18H32O16 | [M+COOH]- | 549.16724 | 549.16626 | 0.22 | Maltotriose | Glycyrrhizae Radix et Rhizoma |
|  |  |  | [M-H]- | 503.16176 | 503.16058 | -0.16 |
| **3** | 1.2 | C12H22O11 | [M-H]- | 341.10893 | 341.10709 | -2.19 | sucrose | Imperatae Rhizoma |
| **4** | 1.7 | C5H5N5 | [M+H]+ | 136.06177 | 136.0619 | 0.94 | Adenine | Isatidis Radix |
| **5** | 1.72 | C5H7NOS | [M+H]+ | 130.03211 | 130.03258 | 3.61 | Epigoitrin | Isatidis Radix |
| **6** | 1.74 | C15H22O10 | [M-H]- | 361.11402 | 361.11337 | 1.24 | Catalpol | Rehmanniae Radix |
| **7** | 1.75 | C5H5N5O | [M+H]+ | 152.05669 | 152.05681 | 0.81 | Guanine | Isatidis Radix |
| **8** | 1.88 | C7H6O5 | [M-H]- | 169.01425 | 169.01282 | -1.95 | gallic acid | Paeoniae Radix Rubra |
| **9** | 2 | C15H24O9 | [M+COOH]- | 393.13914 | 393.13876 | -0.96 | Ajugol | Rehmanniae Radix |
| **10** | 2.54 | C20H30O12 | [M-H]- | 461.16645 | 461.16522 | -0.29 | Forsythoside E | Forsythiae Fructus |
| **11** | 2.68 | C16H18O9 | [M+H]+ | 355.10236 | 355.10233 | -0.08 | Neochlorogenic acid | Lonicerae Japonicae Flos |
|  |  |  | [M-H]- | 353.08781 | 353.08612 | -1.67 |  |  |
| **12** | 2.93 | C7H6O4 | [M-H]- | 153.01933 | 153.01793 | -1.99 | Gentisic acid | Rehmanniae Radix |
| **13** | 4.07 | C23H28O12 | [M-H]- | 495.1508 | 495.14981 | 0.22 | oxypaeoniflorin | Paeoniae Radix Rubra |
| **14** | 4.51 | C16H18O9 | [M+H]+ | 355.10236 | 355.10217 | -0.53 | Chlorogenic acid | Imperatae Rhizoma, Lonicerae Japonicae Flos |
|  |  |  | [M-H]- | 353.08781 | 353.08606 | -1.84 |  |  |
| **15** | 4.97 | C16H22O10 | [M+Na]+ | 397.11052 | 397.11029 | -0.57 | Swertiamarine | Lonicerae Japonicae Flos |
|  |  |  | [M-H]- | 373.11402 | 373.1123 | -1.67 |  |
| **16** | 5.95 | C20H28O12 | [M+Na]+ | 483.1473 | 483.14728 | -0.04 | Paeonolide Isomers | Moutan Cortex |
| **17** | 6.17 | C35H46O20 | [M+NH4]+ | 804.29042 | 804.29193 | -0.17 | Purpureaside C | Rehmanniae Radix |
|  |  |  | [M-H]- | 785.25097 | 785.25012 | 0.32 |  |  |
| **18** | 6.19 | C20H28O12 | [M+Na]+ | 483.1473 | 483.14719 | -0.22 | Paeonolide | Moutan Cortex |
| **19** | 6.37 | C23H28O11 | [M+H]+ | 481.17044 | 481.17017 | -0.56 | Albiflorin | Paeoniae Radix Rubr |
|  |  |  | [M-H]- | 479.15588 | 479.15469 | -0.21 |  |  |
| **20** | 6.49 | C7H6O2 | [M+H]+ | 123.04406 | 123.04427 | 1.74 | p-Hydroxybenzaldehyde | Isatidis Radix |
|  |  | C7H6O2 | [M-H]- | 121.0295 | 121.02807 | -2.78 |  | Isatidis Radix |
| **21** | 6.55 | C26H35NO11 | [M+H]+ | 538.22664 | 538.22815 | -0.26 | UNKNOWN | Forsythiae Fructus |
| **22** | 6.58 | C23H28O11 | [M+NH4]+ | 498.19534 | 498.19666 | -0.66 | Paeoniflorin | Paeoniae Radix Rubra |
|  |  |  | [M+COOH]- | 525.16027 | 525.1604 | 0.25 |  |  |
| **23** | 6.73 | C29H36O15 | [M+H]+ | 625.2127 | 625.21271 | 0.02 | Forsythoside A | Forsythiae Fructus |
|  |  |  | [M-H]- | 623.19814 | 623.19696 | -0.14 | Forsythiae Fructus |
| **24** | 6.73 | C29H36O15 | [M+H]+ | 625.2127 | 625.21271 | 0.02 | Isoacteoside | Rehmanniae Radix |
|  |  |  | [M-H]- | 623.19814 | 623.19696 | -0.14 |  |
| **25** | 6.74 | C27H30O16 | [M-H]- | 609.14611 | 609.14502 | 0.02 | Rutin | Houttuyniae Herba, Lonicerae Japonicae Flos |
| **26** | 6.76 | C9H8O4 | [M+H]+ | 181.04954 | 181.0495 | -0.2 | Caffeic acid | Forsythiae Fructus |
| **27** | 6.85 | C15H12O4 | [M+H]+ | 257.08084 | 257.08078 | -0.22 | Liquiritigenin | Glycyrrhizae Radix et Rhizoma |
|  |  |  | [M-H]- | 255.06628 | 255.06494 | -0.96 |  |  |
| **28** | 6.86 | C26H30O13 | [M-H]- | 549.16136 | 549.16052 | 0.46 | Liquiritin apioside | Glycyrrhizae Radix et Rhizoma |
| **29** | 6.89 | C29H36O15 | [M-H]- | 623.19814 | 623.19727 | 0.36 | Isoforsythiaside | Forsythiae Fructus |
| **30** | 6.95 | C21H22O9 | [M-H]- | 417.11911 | 417.11765 | -0.86 | Liquiritin | Glycyrrhizae Radix et Rhizoma |
| **31** | 6.95 | C21H20O12 | [M-H]- | 463.0882 | 463.08685 | -0.55 | Hyperoside | Houttuyniae Herba, Lonicerae Japonicae Flos |
| **32** | 6.96 | C21H18O12 | [M+H]+ | 463.0871 | 463.08691 | -0.42 | Scutellarin | Scutellariae Radix |
|  |  |  | [M-H]- | 461.07255 | 461.07126 | -0.42 |  | Scutellariae Radix |
| **33** | 6.96 | C15H10O7 | [M+H]+ | 303.04993 | 303.04987 | -0.2 | Quercetin Isomers | Houttuyniae Herba |
| **34** | 8.04 | C15H10O7 | [M+H]+ | 303.04993 | 303.04974 | -0.62 | Quercetin | Houttuyniae Herba, Lonicerae Japonicae Flos, Glycyrrhizae Radix et Rhizoma |
| **35** | 7.14 | C25H24O12 | [M+H]+ | 517.13405 | 517.13434 | 0.56 | Isochlorogenic acid A | Glycyrrhizae Radix et Rhizoma |
|  |  |  | [M-H]- | 515.1195 | 515.11896 | 1.08 | Glycyrrhizae Radix et Rhizoma |
| **36** | 7.22 | C26H32O11 | [M+NH4]+ | 538.22664 | 538.22797 | -0.59 | Pinoresinol 4-O-glucoside | Forsythiae Fructus |
|  |  |  | [M-H]- | 519.18718 | 519.18634 | 0.49 |  |  |
| **37** | 7.22 | C20H22O6 | [M-H]- | 357.13436 | 357.13266 | -1.69 | Glicophenone | Glycyrrhizae Radix et Rhizoma |
| **38** | 7.28 | C25H24O12 | [M+H]+ | 517.13405 | 517.13416 | 0.21 | Isochlorogenic acid B | Lonicerae Japonicae Flos |
|  |  |  | [M-H]- | 515.1195 | 515.1189 | 0.97 |  |
| **39** | 7.31 | C21H20O11 | [M+H]+ | 449.10784 | 449.10751 | -0.73 | Cynaroside | Lonicerae Japonicae Flos |
|  |  |  | [M-H]- | 447.09328 | 447.0921 | -0.2 |  |  |
| **40** | 7.41 | C25H24O12 | [M+H]+ | 517.13405 | 517.13403 | -0.04 | Isochlorogenic acid C | Lonicerae Japonicae Flos |
|  |  |  | [M-H]- | 515.1195 | 515.11877 | 0.71 |  |
| **41** | 7.55 | C26H30O13 | [M-H]- | 549.16136 | 549.16071 | 0.81 | Isoliquiritin apioside | Glycyrrhizae Radix et Rhizoma |
| **42** | 7.56 | C23H28O11 | [M+H]+ | 481.17044 | 481.17029 | -0.31 | Paeoniflorin Isomers | Paeoniae Radix Rubra |
|  |  |  | [M-H]- | 479.15588 | 479.15485 | 0.13 |  |  |
| **43** | 7.62 | C26H32O11 | [M+NH4]+ | 538.22664 | 538.22827 | -0.03 | UNKNOWN | Forsythiae Fructus |
|  |  |  | [M-H]- | 519.18718 | 519.18652 | 0.83 |  |  |
| **44** | 7.62 | C20H22O6 | [M+H]+ | 359.14891 | 359.14883 | -0.24 | Matairesinol | Arctii Fructus |
|  |  |  | [M-H]- | 357.13436 | 357.13266 | -1.69 |
| **45** | 7.74 | C21H22O9 | [M+H]+ | 419.13366 | 419.13373 | 0.17 | Isoliquiritin | Glycyrrhizae Radix et Rhizoma |
| **46** | 7.8 | C21H18O11 | [M+H]+ | 447.09219 | 447.09155 | -1.43 | Baicalin | Scutellariae Radix |
|  |  |  | [M-H]- | 445.07763 | 445.07617 | -0.83 |  |  |
| **47** | 7.91 | C15H10O6 | [M+H]+ | 287.05501 | 287.05493 | -0.29 | Scutellarein | Scutellariae Radix |
|  |  |  | [M-H]- | 285.04046 | 285.03934 | -0.09 |  |  |
| **48** | 7.91 | C15H10O6 |  | 287.05501 | 287.05496 | -0.19 | Luteolin | Lonicerae Japonicae Flos |
|  |  |  | [M-H]- | 285.04046 | 285.03934 | -0.09 |  |  |
| **49** | 7.32 | C21H20O11 | [M+H]+ | 449.10784 | 449.10751 | -0.73 | Quercitrin | Paeoniae Radix Rubra, Lonicerae Japonicae Flos |
|  |  |  | [M-H]- | 447.09328 | 447.08182 | -2.2 |  |  |
| **50** | 8.07 | C27H34O11 | [M+NH4]+ | 552.24394 | 552.24329 | -1.17 | Forsythin | Forsythiae Fructus |
|  |  |  | [M+COOH]- | 579.20722 | 579.20728 | 0.11 |  |  |
| **51** | 8.07 | C21H24O6 | [M+H]+ | 373.16457 | 373.16418 | -1.03 | Arctigenin | Arctii Fructus |
| **52** | 8.07 | C27H34O11 | [M+NH4]+ | 552.24394 | 552.24329 | -1.17 | Arctiin | Arctii Fructus |
|  |  |  | [M+COOH]- | 579.20722 | 579.20728 | 0.11 |  |  |
| **53** | 8.07 | C20H18O4 | [M+H]+ | 323.12779 | 323.12753 | -0.79 | Licoflavone A | Glycyrrhizae Radix et Rhizoma |
| **54** | 8.08 | C15H10O5 | [M+H]+ | 271.0601 | 271.05991 | -0.7 | Baicalein | Scutellariae Radix |
|  |  |  | [M-H]- | 269.04555 | 269.04416 | -1.08 |  |  |
| **55** | 8.22 | C22H20O11 | [M+H]+ | 461.10784 | 461.10736 | -1.04 | Wogonoside | Scutellariae Radix |
|  |  |  | [M-H]- | 459.09328 | 459.09183 | -0.78 |  |  |
| **56** | 8.28 | C16H16O5 | [M+H]+ | 289.10705 | 289.1069 | -0.52 | Alkannin | Arnebiae Radix |
|  |  |  | [M-H]- | 287.0925 | 287.05493 | -0.29 |  |  |
| **57** | 8.29 | C16H16O5 | [M-H]- | 287.0925 | 287.05493 | -0.29 | Shikonin | Arnebiae Radix |
| **58** | 8.35 | C15H12O4 | [M-H]- | 255.06628 | 255.0649 | -1.12 | Isoliquiritigenin | Glycyrrhizae Radix et Rhizoma |
| **59** | 8.42 | C16H12O5 | [M+H]+ | 285.07575 | 285.07553 | -0.77 | Wogonin | Scutellariae Radix |
|  |  |  | [M-H]- | 283.0612 | 283.05994 | -0.57 |  |  |
| **60** | 8.48 | C16H14O5 | [M+H]+ | 287.0914 | 287.09131 | -0.31 | Licochalcone B | Glycyrrhizae Radix et Rhizoma |
|  |  |  | [M-H]- | 285.07685 | 285.07574 | -0.04 |  |
| **61** | 8.57 | C30H44O4 | [M+H]+ | 469.33124 | 469.33127 | 0.07 | Uralenolide | Glycyrrhizae Radix et Rhizoma |
| **62** | 8.75 | C30H32O12 | [M+H]+ | 585.19665 | 585.19727 | 1.06 | Benzoylpaeoniflorin | Paeoniae Radix Rubra, Moutan Cortex |
|  |  |  | [M-H]- | 583.1821 | 583.1814 | 0.68 |  |  |
| **63** | 8.94 | C30H44O4 | [M+H]+ | 469.33124 | 469.33127 | 0.07 | Isomasticadienonalic acid | Glycyrrhizae Radix et Rhizoma |
| **64** | 9.08 | C20H22O6 | [M+H]+ | 359.14891 | 359.14899 | 0.21 | Isobutyrylshikonin | Arnebiae Radix |
|  |  |  | [M-H]- | 357.13436 | 357.13266 | -1.69 |  |
| **65** | 9.22 | C42H62O16 | [M+H]+ | 823.41106 | 823.4104 | -0.8 | Glycyrrhizic acid | Glycyrrhizae Radix et Rhizoma |
|  |  |  | [M-H]- | 821.39651 | 821.39551 | 0.12 |  |  |
| **66** | 9.23 | C30H46O4 | [M+H]+ | 471.34689 | 471.34686 | -0.06 | 18 β-Glycyrrhetintic Acid | Glycyrrhizae Radix et Rhizoma |
| **67** | 9.55 | C42H62O16 | [M+H]+ | 823.41106 | 823.41064 | -0.51 | 18 β-Glycyrrhetintic Acid Isomers | Glycyrrhizae Radix et Rhizoma |
|  |  |  | [M-H]- | 821.39651 | 821.39557 | 0.19 |  |  |
| **68** | 9.71 | C21H24O6 | [M+H]+ | 373.16457 | 373.16418 | -1.03 | Phillygenin | Forsythiae Fructus |
| **69** | 9.71 | C21H24O6 | [M+H]+ | 373.16457 | 373.16455 | -0.04 |  | Arctii Fructus |
| **70** | 9.76 | C17H14O3 | [M+H]+ | 267.10157 | 267.10168 | 0.41 | 5-Methyl-7-methoxyisoflavone | Glycyrrhizae Radix et Rhizoma |
| **71** | 9.89 | C9H10O3 | [M+H]+ | 167.07027 | 167.07037 | 0.59 | Paeonol | Moutan Cortex |
| **72** | 11.05 | C24H30O6 | [M+H]+ | 415.21152 | 415.21121 | -0.74 | UNKNOWN |  |
|  |  |  | [M+NH4]+ | 432.23642 | 432.23792 | -0.33 |  |  |
| **73** | 11.28 | C20H20O4 | [M-H]- | 323.12888 | 323.12799 | 0.63 | Glabridin | Glycyrrhizae Radix et Rhizoma |
| **74** | 11.33 | C20H16O5 | [M-H]- | 335.0925 | 335.09158 | 0.54 | Isosojagol | Glycyrrhizae Radix et Rhizoma |
| **75** | 11.67 | C25H28O4 | [M-H]- | 391.19148 | 391.18967 | -1.83 | Kanzonol C | Glycyrrhizae Radix et Rhizoma |
| **76** | 11.84 | C20H16O5 | [M-H]- | 335.0925 | 335.09155 | 0.45 | Musanolone D | Glycyrrhizae Radix et Rhizoma |

**Table S2** Active compounds in QBY and their putative targets

| **Compound** | **Target** | **Compound** | **Target** | **Compound** | **Target** |
| --- | --- | --- | --- | --- | --- |
| Stachyose | CDK1 | Liquiritigenin | DYRK1B | Alkannin | CSNK2B |
| Stachyose | VEGFA | Liquiritigenin | HSD17B14 | Alkannin | SCN3A |
| Stachyose | FGF1 | Liquiritigenin | BCHE | Alkannin | AAK1 |
| Stachyose | FGF2 | Liquiritigenin | CHRNA7 | Alkannin | NR3C2 |
| Stachyose | HPSE | Liquiritigenin | DYRK1A | Alkannin | CDK5 |
| Stachyose | HSP90AA1 | Liquiritigenin | KIT | Alkannin | BMP2K |
| Stachyose | LGALS4 | Liquiritigenin | MET | Alkannin | GPR55 |
| Stachyose | LGALS8 | Liquiritigenin | CTSB | Alkannin | CHRNB4 |
| Stachyose | PSEN2 | Liquiritigenin | HSD17B2 | Alkannin | MAP2K2 |
| Stachyose | HTR2B | Liquiritigenin | RPS6KA5 | Alkannin | NTRK3 |
| Stachyose | ADRA2A | Liquiritigenin | PLA2G2A | Alkannin | FPR1 |
| Stachyose | ADRA2C | Liquiritigenin | SIRT2 | Alkannin | SLC6A5 |
| Stachyose | ADRA2B | Liquiritigenin | YWHAG | Alkannin | PRCP |
| Stachyose | DRD1 | Liquiritigenin | WEE1 | Alkannin | SCD |
| Stachyose | DRD2 | Liquiritigenin | DNM1 | Alkannin | FPR2 |
| Stachyose | ADRA1D | Liquiritigenin | PTGER1 | Alkannin | AVPR1B |
| Stachyose | HTR2A | Liquiritigenin | PTGER4 | Alkannin | KLF5 |
| Stachyose | HTR2C | Liquiritigenin | PTGER2 | Alkannin | ADAM10 |
| Stachyose | DRD3 | Liquiritigenin | PTGER3 | Alkannin | S1PR5 |
| Stachyose | CYP2D6 | Liquiritigenin | VCP | Alkannin | GRIA2 |
| Stachyose | HTR6 | Liquiritigenin | GRM2 | Alkannin | VDR |
| Stachyose | ADRA1A | Liquiritigenin | INSR | Alkannin | CYP2A6 |
| Stachyose | HTR1B | Liquiritigenin | DUSP3 | Alkannin | HDAC10 |
| Stachyose | RORC | Liquiritigenin | PDPK1 | Alkannin | PSMB2 |
| Stachyose | LGALS3 | Liquiritigenin | GSK3B | Alkannin | PDGFRA |
| Stachyose | TRPV1 | Liquiritigenin | CALM1 | Alkannin | QRFPR |
| Stachyose | AMY2A | Liquiritigenin | HNF4A | Alkannin | KIF11 |
| Stachyose | STAT3 | Liquiritigenin | HDAC5 | Alkannin | GPBAR1 |
| Maltotriose | SLC6A2 | Liquiritigenin | HDAC7 | Alkannin | CHRNA1 |
| sucrose | FOLH1 | Liquiritigenin | HDAC9 | Alkannin | ITK |
| Adenine | ADORA2A | Liquiritigenin | PGF | Alkannin | DPP9 |
| Adenine | CCNE1 | Liquiritin apioside | EIF4A1 | Alkannin | NTSR2 |
| Adenine | ADORA2B | Quercetin | AVPR2 | Alkannin | P2RX4 |
| Adenine | GDA | Quercetin | MAOA | Alkannin | PDE11A |
| Epigoitrin | METAP1 | Quercetin | FLT3 | Alkannin | CACNA1H |
| Catalpol | CA2 | Quercetin | F2 | Alkannin | CCR2 |
| Catalpol | CA1 | Quercetin | PIM1 | Alkannin | PLAT |
| Catalpol | CA12 | Quercetin | AURKB | Alkannin | SAE1 |
| Catalpol | CA9 | Quercetin | DRD4 | Alkannin | DCUN1D1 |
| Catalpol | TREH | Quercetin | GLO1 | Alkannin | GRIN1 |
| Catalpol | FUCA1 | Quercetin | MPO | Alkannin | PROC |
| Catalpol | ADORA1 | Quercetin | PIK3R1 | Shikonin | IL10 |
| Catalpol | PYGM | Quercetin | DAPK1 | Shikonin | TGFB1 |
| Catalpol | HK2 | Quercetin | PTK2 | Shikonin | FOXP3 |
| Catalpol | HK1 | Quercetin | ALOX15 | Shikonin | IL17A |
| Catalpol | ADA | Quercetin | PLK1 | Shikonin | RORA |
| Catalpol | HPRT1 | Quercetin | PKN1 | Shikonin | CDKN1C |
| Catalpol | GGH | Quercetin | CSNK2A1 | Shikonin | ELF4 |
| Catalpol | CA14 | Quercetin | ALOX12 | Shikonin | SH2B1 |
| Catalpol | OGA | Quercetin | NEK2 | Shikonin | UBA2 |
| Catalpol | NAALAD2 | Quercetin | CXCR1 | Isoliquiritigenin | SNCA |
| Guanine | PNP | Quercetin | CAMK2B | Isoliquiritigenin | KCNA3 |
| Guanine | TK1 | Quercetin | AKT1 | Isoliquiritigenin | TLR9 |
| Guanine | MAPK8 | Quercetin | NEK6 | Isoliquiritigenin | KCNMA1 |
| Guanine | MAPK9 | Quercetin | AXL | Isoliquiritigenin | STS |
| Guanine | KDR | Quercetin | NUAK1 | Isoliquiritigenin | DHODH |
| gallic acid | CA7 | Quercetin | AKR1C2 | Wogonin | ODC1 |
| gallic acid | CA3 | Quercetin | AKR1C1 | Wogonin | HSP90B1 |
| gallic acid | CA6 | Quercetin | AKR1A1 | Licochalcone B | CXCR4 |
| gallic acid | FUT7 | Quercetin | MAPT | Licochalcone B | GLI2 |
| gallic acid | CA4 | Quercetin | TOP2A | Licochalcone B | GLI1 |
| gallic acid | CA5B | Quercetin | MYLK | Licochalcone B | BCL2 |
| gallic acid | CA5A | Quercetin | PIK3CG | Licochalcone B | MAP4K4 |
| gallic acid | CA13 | Quercetin | APEX1 | Licochalcone B | ADCY5 |
| gallic acid | SQLE | Quercetin | PTPRS | Licochalcone B | ALOX5AP |
| gallic acid | LDHA | Quercetin | MPG | Licochalcone B | HPGDS |
| gallic acid | LDHB | Quercetin | SLC22A12 | Licochalcone B | PGD |
| gallic acid | TTR | Quercetin | CDK5R1 | Licochalcone B | PLAU |
| gallic acid | IGF1R | Quercetin | CCNB3 | Licochalcone B | DRD5 |
| gallic acid | ALK | Quercetin | ARG1 | Licochalcone B | SIGMAR1 |
| gallic acid | SERPINE1 | Quercetin | CDK6 | Licochalcone B | CHEK2 |
| gallic acid | ESR2 | Quercetin | AHR | Licochalcone B | HDAC6 |
| gallic acid | BCL2L1 | Quercetin | TNKS2 | Uralenolide | HMGCR |
| gallic acid | GPR35 | Quercetin | TNKS | Uralenolide | CYP17A1 |
| gallic acid | COMT | Isochlorogenic acid A | PTGDR2 | Uralenolide | MTNR1A |
| gallic acid | TPMT | Isochlorogenic acid A | PPP2CA | Uralenolide | MTNR1B |
| Ajugol | MGAM | Pinoresinol 4-O-glucoside | SOAT1 | Uralenolide | CCND1 |
| Ajugol | CDA | Pinoresinol 4-O-glucoside | HIF1A | Uralenolide | IL1B |
| Ajugol | TYR | Pinoresinol 4-O-glucoside | SOAT2 | Uralenolide | TEK |
| Ajugol | SI | Glicophenone | PDE7A | Uralenolide | TBXAS1 |
| Ajugol | ADORA3 | Glicophenone | SPHK2 | Uralenolide | AVPR1A |
| Ajugol | AKR1C3 | Glicophenone | SPHK1 | Uralenolide | TACR1 |
| Ajugol | DTYMK | Glicophenone | PIM2 | Uralenolide | CHUK |
| Ajugol | ADK | Glicophenone | PIM3 | Uralenolide | MDM4 |
| Ajugol | CDK2 | Glicophenone | AR | Uralenolide | IDH1 |
| Forsythoside E | MMP12 | Glicophenone | HDAC2 | Uralenolide | CYP24A1 |
| Forsythoside E | MMP2 | Glicophenone | NCOR2 | Uralenolide | NPY5R |
| Forsythoside E | MMP13 | Glicophenone | HDAC8 | Isomasticadienonalic acid | SRD5A2 |
| Forsythoside E | MMP1 | Glicophenone | BRAF | Isomasticadienonalic acid | HSD11B2 |
| Forsythoside E | MMP7 | Glicophenone | PDE10A | Isomasticadienonalic acid | NPC1L1 |
| Forsythoside E | MMP8 | Glicophenone | HDAC3 | Isomasticadienonalic acid | SERPINA6 |
| Forsythoside E | TNF | Glicophenone | RPS6KB1 | Isomasticadienonalic acid | HSD17B3 |
| Forsythoside E | PRKCA | Glicophenone | MDM2 | Isomasticadienonalic acid | PGR |
| Forsythoside E | HRAS | Cynaroside | ALDH2 | Isomasticadienonalic acid | UGT2B7 |
| Forsythoside E | TDP1 | Cynaroside | PLG | Isomasticadienonalic acid | NR1I3 |
| Forsythoside E | MME | Isochlorogenic acid B | SF3B3 | Isomasticadienonalic acid | FABP1 |
| Forsythoside E | ECE1 | Isochlorogenic acid B | PSMB5 | Isomasticadienonalic acid | LTB4R |
| Forsythoside E | SLC28A3 | Isochlorogenic acid B | KDM4D | Isomasticadienonalic acid | PPARD |
| Neochlorogenic acid | AKR1B1 | Isochlorogenic acid B | KDM4C | Isomasticadienonalic acid | FABP4 |
| Neochlorogenic acid | AKR1B10 | Isochlorogenic acid B | YARS | Isomasticadienonalic acid | SLC6A4 |
| Neochlorogenic acid | APP | Isochlorogenic acid B | ITGB1 | Isomasticadienonalic acid | TRPM8 |
| Neochlorogenic acid | SLC37A4 | Isochlorogenic acid B | SELE | Isomasticadienonalic acid | PGGT1B |
| Neochlorogenic acid | PYGL | Isochlorogenic acid B | TYMS | Isomasticadienonalic acid | PTGIR |
| Neochlorogenic acid | PRKCD | Isochlorogenic acid B | SELL | Isomasticadienonalic acid | CCKBR |
| Neochlorogenic acid | NEU4 | Isochlorogenic acid B | GRK6 | Isomasticadienonalic acid | ABCC8 |
| Neochlorogenic acid | BACE1 | Isochlorogenic acid B | MGLL | Isomasticadienonalic acid | SLC22A1 |
| Neochlorogenic acid | CASP3 | Isochlorogenic acid B | BMP1 | Isomasticadienonalic acid | ITGAV |
| Neochlorogenic acid | PDE4D | Isochlorogenic acid B | MAP3K14 | Isomasticadienonalic acid | PRKAG1 |
| Neochlorogenic acid | PDE9A | Isochlorogenic acid B | AMPD3 | Isomasticadienonalic acid | PPARA |
| Neochlorogenic acid | PDE1B | Matairesinol | LYPLA1 | Isomasticadienonalic acid | PTPN6 |
| Neochlorogenic acid | ENGASE | Matairesinol | LYPLA2 | Isomasticadienonalic acid | KLKB1 |
| Neochlorogenic acid | ABCB1 | Matairesinol | SLC6A3 | Isomasticadienonalic acid | MAPK10 |
| Neochlorogenic acid | NEU3 | Matairesinol | HTR1A | Isomasticadienonalic acid | F11 |
| Neochlorogenic acid | NEU2 | Matairesinol | RAF1 | Isomasticadienonalic acid | EDNRB |
| Neochlorogenic acid | ELANE | Matairesinol | UPP1 | Isomasticadienonalic acid | NR1H3 |
| Neochlorogenic acid | CASP6 | Matairesinol | GCGR | Isomasticadienonalic acid | KCNH2 |
| Neochlorogenic acid | CASP7 | Matairesinol | PTGFR | Isomasticadienonalic acid | PTGDR |
| Neochlorogenic acid | CASP8 | Matairesinol | NR3C1 | Isomasticadienonalic acid | BRD4 |
| Neochlorogenic acid | CASP1 | Matairesinol | QDPR | Isomasticadienonalic acid | BRD2 |
| Neochlorogenic acid | CASP2 | Matairesinol | POLA1 | Isomasticadienonalic acid | BRD3 |
| Neochlorogenic acid | EGLN1 | Matairesinol | SGK1 | Isomasticadienonalic acid | ITGA4 |
| Neochlorogenic acid | ADAMTS5 | Matairesinol | ERCC5 | Isomasticadienonalic acid | CYP26B1 |
| Neochlorogenic acid | FTO | Matairesinol | FEN1 | Isomasticadienonalic acid | CYP26A1 |
| Gentisic acid | ALB | Matairesinol | HTR7 | Isomasticadienonalic acid | PBRM1 |
| Gentisic acid | ERN1 | Matairesinol | CDK4 | Isomasticadienonalic acid | BRDT |
| oxypaeoniflorin | LGALS9 | Matairesinol | CAPN1 | Isobutyrylshikonin | DNMT3B |
| oxypaeoniflorin | F10 | Matairesinol | PAK4 | Isobutyrylshikonin | CPT1A |
| oxypaeoniflorin | AMY1A | Matairesinol | RELA | Isobutyrylshikonin | BIRC2 |
| oxypaeoniflorin | PTPN1 | Matairesinol | DHFR | Isobutyrylshikonin | HCK |
| oxypaeoniflorin | SSTR5 | Matairesinol | PITRM1 | Isobutyrylshikonin | CFD |
| oxypaeoniflorin | SSTR2 | Matairesinol | PNMT | Isobutyrylshikonin | ALPG |
| oxypaeoniflorin | SSTR4 | Matairesinol | CNR1 | Isobutyrylshikonin | PLAA |
| oxypaeoniflorin | SSTR1 | Matairesinol | PIK3CD | Isobutyrylshikonin | NR4A1 |
| oxypaeoniflorin | SSTR3 | Matairesinol | CHRNA4 | Isobutyrylshikonin | ADAMTS4 |
| oxypaeoniflorin | PTPN2 | Matairesinol | CNR2 | Isobutyrylshikonin | CXCR2 |
| oxypaeoniflorin | EIF4H | Matairesinol | ROCK1 | Isobutyrylshikonin | HDAC11 |
| oxypaeoniflorin | PABPC1 | Matairesinol | PRKACA | Isobutyrylshikonin | HCRTR2 |
| Swertiamarine | HSPA8 | Matairesinol | MELK | Isobutyrylshikonin | HCRTR1 |
| Swertiamarine | GRK1 | Matairesinol | PDK1 | Isobutyrylshikonin | MMP16 |
| Swertiamarine | GAPDH | Matairesinol | YES1 | Isobutyrylshikonin | MMP15 |
| Swertiamarine | GBA | Matairesinol | BLK | Isobutyrylshikonin | MMP26 |
| Swertiamarine | MCL1 | Matairesinol | ADRA1B | Isobutyrylshikonin | IDO1 |
| Swertiamarine | TYMP | Matairesinol | CSK | Isobutyrylshikonin | NR1D1 |
| Swertiamarine | DAO | Matairesinol | EPHB2 | Isobutyrylshikonin | CPT2 |
| Swertiamarine | PTPN11 | Matairesinol | BMX | Isobutyrylshikonin | PI4KB |
| Swertiamarine | SLC5A2 | Matairesinol | LYN | Glycyrrhizic acid | SAMD3 |
| Swertiamarine | HSPA5 | Matairesinol | EPHA5 | Glycyrrhizic acid | SAMD7 |
| Purpureaside C | MMP9 | Matairesinol | EPHA4 | Glycyrrhizic acid | SMAD2 |
| Paeonolide | EPHX2 | Matairesinol | TXK | Glycyrrhizic acid | JUN |
| Paeonolide | SLC5A1 | Matairesinol | FGR | 18 **β-Glycyrrhetintic Acid** | PTPRF |
| Paeonolide | SLC5A4 | Matairesinol | EPHA6 | 18 **β-Glycyrrhetintic Acid** | ACP1 |
| Paeonolide | ESR1 | Matairesinol | PTK6 | 18 **β-Glycyrrhetintic Acid** | G6PD |
| Paeonolide | CYP19A1 | Matairesinol | EPHB3 | 18 **β-Glycyrrhetintic Acid** | CYP51A1 |
| Paeonolide | SLC29A1 | Matairesinol | EPHA3 | 18 **β-Glycyrrhetintic Acid** | CD81 |
| Paeonolide | SRD5A1 | Matairesinol | TYRO3 | 18 **β-Glycyrrhetintic Acid** | FAAH |
| Paeonolide | EGFR | Matairesinol | COQ8B | 18 **β-Glycyrrhetintic Acid** | FABP3 |
| Albiflorin | PTAFR | Matairesinol | EPHA1 | 18 **β-Glycyrrhetintic Acid** | FABP5 |
| Albiflorin | SELP | Matairesinol | NEK1 | 18 **β-Glycyrrhetintic Acid** | IL6 |
| Albiflorin | PPM1A | Matairesinol | OPRM1 | 18 **β-Glycyrrhetintic Acid** | GLUL |
| Albiflorin | TOP1 | Matairesinol | OPRK1 | 18 **β-Glycyrrhetintic Acid** | HAO1 |
| Albiflorin | LGALS7 | Scutellarein | CFTR | 18 **β-Glycyrrhetintic Acid** | SLC10A2 |
| Albiflorin | FDFT1 | Scutellarein | PFKFB3 | 18 **β-Glycyrrhetintic Acid** | FFAR1 |
| Albiflorin | IMPDH1 | Arctigenin | TUBB3 | Phillygenin | EIF2AK3 |
| Albiflorin | NRAS | Arctigenin | CSF1R | Phillygenin | FBP1 |
| Albiflorin | MGMT | Arctigenin | MAPKAPK2 | Phillygenin | PLA2G7 |
| Albiflorin | MMP3 | Arctigenin | RET | Phillygenin | CPB1 |
| Albiflorin | ADAM17 | Arctigenin | CTSS | 5-Methyl-7-methoxyisoflavone | BDKRB2 |
| Albiflorin | AGTR1 | Arctigenin | PTGES | 5-Methyl-7-methoxyisoflavone | UTS2R |
| Albiflorin | SLC28A2 | Arctigenin | QPCTL | 5-Methyl-7-methoxyisoflavone | GPR139 |
| Albiflorin | PRKCG | Arctigenin | TUBB1 | 5-Methyl-7-methoxyisoflavone | GABRB3 |
| Albiflorin | PRKCH | Arctigenin | FLT1 | 5-Methyl-7-methoxyisoflavone | NAAA |
| Albiflorin | F3 | Arctigenin | PDGFRB | 5-Methyl-7-methoxyisoflavone | CDK9 |
| Albiflorin | MAP2K1 | Arctigenin | PDE4A | 5-Methyl-7-methoxyisoflavone | GRM1 |
| Albiflorin | IGFBP3 | Arctigenin | PDE4B | 5-Methyl-7-methoxyisoflavone | P2RX7 |
| Albiflorin | VARS | Arctigenin | PDE4C | 5-Methyl-7-methoxyisoflavone | THRB |
| Albiflorin | PARP1 | Arctigenin | QPCT | 5-Methyl-7-methoxyisoflavone | KCNJ5 |
| Albiflorin | LARS | Arctigenin | MTOR | 5-Methyl-7-methoxyisoflavone | KCNJ6 |
| Albiflorin | METAP2 | Arctigenin | JAK2 | 5-Methyl-7-methoxyisoflavone | RBP4 |
| Albiflorin | ABL1 | Arctigenin | GCK | 5-Methyl-7-methoxyisoflavone | PGK1 |
| Albiflorin | EPHA2 | Arctigenin | LNPEP | 5-Methyl-7-methoxyisoflavone | TNFRSF1A |
| Albiflorin | LCK | Arctigenin | TGFBR1 | 5-Methyl-7-methoxyisoflavone | HRH4 |
| Albiflorin | SRC | Arctigenin | EPHB4 | 5-Methyl-7-methoxyisoflavone | KCNA5 |
| Albiflorin | MAP3K9 | Arctigenin | CRHR1 | 5-Methyl-7-methoxyisoflavone | DPP4 |
| Albiflorin | FGFR1 | Arctigenin | CTSL | 5-Methyl-7-methoxyisoflavone | NOS1 |
| Albiflorin | AURKA | Arctigenin | ALPL | 5-Methyl-7-methoxyisoflavone | GABRA2 |
| Albiflorin | BTK | Arctigenin | GRIA1 | 5-Methyl-7-methoxyisoflavone | C1R |
| Albiflorin | MARS | Arctigenin | CLK3 | 5-Methyl-7-methoxyisoflavone | PMM2 |
| Albiflorin | AMD1 | Arctigenin | DYRK2 | 5-Methyl-7-methoxyisoflavone | PHOSPHO1 |
| p-Hydroxybenzaldehyde | ACHE | Arctigenin | MKNK1 | Paeonol | EP300 |
| p-Hydroxybenzaldehyde | ALDH5A1 | Arctigenin | RIPK2 | Paeonol | FASN |
| p-Hydroxybenzaldehyde | ABAT | Arctigenin | ANPEP | Paeonol | CISD1 |
| Paeoniflorin | HDAC1 | Arctigenin | TBXA2R | Paeonol | MB |
| Paeoniflorin | CHEK1 | Arctigenin | JAK3 | Paeonol | NAT1 |
| Paeoniflorin | CDC25B | Arctigenin | CDC25C | Paeonol | PLEC |
| Forsythoside A | NADK | Arctigenin | TBK1 | Paeonol | CSNK1A1 |
| Forsythoside A | IMPDH2 | Arctigenin | F9 | Paeonol | PTPN22 |
| Forsythoside A | CHIA | Arctigenin | MBD2 | Glabridin | GSK3A |
| Rutin | NMUR2 | Arctigenin | MMP14 | Glabridin | SREBF2 |
| Rutin | NOX4 | Arctigenin | SMARCA2 | Glabridin | MERTK |
| Rutin | NQO2 | Arctigenin | PREP | Glabridin | CYP11B1 |
| Rutin | RPS6KA3 | Arctigenin | FAP | Glabridin | CYP11B2 |
| Rutin | XDH | Arctigenin | JAK1 | Glabridin | BMP4 |
| Rutin | CD38 | Arctigenin | NOX1 | Glabridin | MPEG1 |
| Rutin | PTGS2 | Arctigenin | ENPP2 | Glabridin | S1PR3 |
| Rutin | PDE5A | Arctiin | GABRA5 | Glabridin | TNNC1 |
| Rutin | IL2 | Arctiin | PRF1 | Glabridin | STAT6 |
| Rutin | ALOX5 | Arctiin | MAPK14 | Glabridin | CMA1 |
| Rutin | TERT | Arctiin | SLC2A1 | Glabridin | ACVR1 |
| Caffeic acid | HCAR2 | Arctiin | SCN9A | Glabridin | STK17B |
| Caffeic acid | MIF | Arctiin | GYS1 | Glabridin | ROCK2 |
| Caffeic acid | TLR4 | Arctiin | P2RY12 | Glabridin | HPGD |
| Caffeic acid | ERBB2 | Arctiin | MKNK2 | Isosojagol | XPO1 |
| Caffeic acid | MAPK1 | Arctiin | NTRK1 | Isosojagol | HSP90AB1 |
| Caffeic acid | AKR1C4 | Arctiin | ICAM1 | Isosojagol | GPR84 |
| Caffeic acid | SYK | Arctiin | EIF2AK1 | Musanolone D | PDE3A |
| Caffeic acid | FYN | Arctiin | CSNK1D | Musanolone D | GLS |
| Caffeic acid | NGFR | Arctiin | LRRK2 | Musanolone D | PRKCZ |
| Caffeic acid | CTBP2 | Licoflavone A | NAE1 | Musanolone D | SLC1A3 |
| Caffeic acid | MAOB | Licoflavone A | NTRK2 | Musanolone D | CACNA1B |
| Caffeic acid | PIK3CB | Licoflavone A | CCR4 | Musanolone D | FFAR4 |
| Caffeic acid | CYP1A2 | Licoflavone A | CYP1A1 | Musanolone D | PIN1 |
| Caffeic acid | CYP2C9 | Licoflavone A | ST6GAL1 | Musanolone D | C5AR1 |
| Caffeic acid | CYP3A4 | Licoflavone A | FNTA | Musanolone D | RORB |
| Caffeic acid | CYP2C19 | Baicalein | ASAH1 | Musanolone D | ADRB1 |
| Caffeic acid | PIK3CA | Baicalein | UGCG | Musanolone D | KDM1A |
| Caffeic acid | PTGS1 | Baicalein | SGMS1 | Musanolone D | ENPP1 |
| Caffeic acid | HSD11B1 | Baicalein | LSS | Musanolone D | FKBP1A |
| Caffeic acid | KDM4E | Baicalein | STIM1 | Musanolone D | F13A1 |
| Caffeic acid | KDM4A | Baicalein | S1PR1 | Musanolone D | TFPI |
| Caffeic acid | NFE2L2 | Baicalein | NOD2 | Musanolone D | MC4R |
| Liquiritigenin | HSD17B1 | Baicalein | IKBKB | Musanolone D | DUT |
| Liquiritigenin | ABCC1 | Baicalein | NOS2 | Musanolone D | PDE3B |
| Liquiritigenin | SHBG | Baicalein | OPRD1 | Musanolone D | ACVRL1 |
| Liquiritigenin | CYP1B1 | Baicalein | TACR2 | Musanolone D | GGPS1 |
| Liquiritigenin | CBR1 | Baicalein | PRKDC | Musanolone D | ACE |
| Liquiritigenin | ABCG2 | Baicalein | MAPK3 | Musanolone D | MAP3K11 |
| Liquiritigenin | TAS2R31 | Baicalein | SIRT1 | Musanolone D | DPP7 |
| Liquiritigenin | PLA2G1B | Baicalein | PLA2G4A | Musanolone D | SLC6A9 |
| Liquiritigenin | CES1 | Alkannin | CDC25A | Musanolone D | MC5R |
| Liquiritigenin | PPARG | Alkannin | PKM | Musanolone D | ACACB |
| Liquiritigenin | CES2 | Alkannin | CTSD | Musanolone D | ERAP1 |
| Liquiritigenin | POLB | Alkannin | HSD17B10 | Musanolone D | TLR8 |
| Liquiritigenin | PLA2G5 | Alkannin | CLK4 | Musanolone D | GBA2 |
| Liquiritigenin | PLA2G10 | Alkannin | TRIM24 | Musanolone D | NLK |
| Liquiritigenin | GRM5 | Alkannin | NR1I2 | Musanolone D | MARK4 |
| Liquiritigenin | RXRA | Alkannin | THRA | Musanolone D | CREBBP |
| Liquiritigenin | EDNRA | Alkannin | GLRA1 | Musanolone D | ITGB3 |
| Liquiritigenin | KLK1 | Alkannin | NFKB1 | Musanolone D | MCHR1 |
| Liquiritigenin | KLK2 | Alkannin | DPP8 | Musanolone D | KLK7 |
| Liquiritigenin | ESRRA | Alkannin | PSMB1 | Musanolone D | ZAP70 |
| Liquiritigenin | ESRRB | Alkannin | GUSB | Musanolone D | NAMPT |
| Liquiritigenin | CLK1 |  |  |  |  |

**Table S3** KEGG pathway enrichment analysis for the putative targets of QBY.

| **ID** | **Description** | **GeneRatio** | **BgRatio** | **pvalue** | **p.adjust** | **qvalue** | **Count** |
| --- | --- | --- | --- | --- | --- | --- | --- |
| hsa05417 | Lipid and atherosclerosis | 43/242 | 216/8846 | 1.18308E-25 | 3.38362E-23 | 1.29516E-23 | 43 |
| hsa04933 | AGE-RAGE signaling pathway in diabetic complications | 31/242 | 101/8846 | 9.23727E-25 | 1.32093E-22 | 5.05619E-23 | 31 |
| hsa04659 | Th17 cell differentiation | 29/242 | 108/8846 | 2.2207E-21 | 2.11707E-19 | 8.10362E-20 | 29 |
| hsa04151 | PI3K-Akt signaling pathway | 48/242 | 362/8846 | 1.39368E-20 | 9.96479E-19 | 3.81427E-19 | 48 |
| hsa05167 | Kaposi sarcoma-associated herpesvirus infection | 34/242 | 196/8846 | 2.15304E-18 | 1.23154E-16 | 4.71402E-17 | 34 |
| hsa05212 | Pancreatic cancer | 23/242 | 77/8846 | 2.61053E-18 | 1.24435E-16 | 4.76307E-17 | 23 |
| hsa01521 | EGFR tyrosine kinase inhibitor resistance | 23/242 | 80/8846 | 6.81768E-18 | 2.78551E-16 | 1.06622E-16 | 23 |
| hsa05142 | Chagas disease | 25/242 | 103/8846 | 2.09823E-17 | 7.50117E-16 | 2.87126E-16 | 25 |
| hsa05215 | Prostate cancer | 24/242 | 98/8846 | 7.57922E-17 | 2.40851E-15 | 9.21917E-16 | 24 |
| hsa05163 | Human cytomegalovirus infection | 34/242 | 226/8846 | 2.06036E-16 | 5.89264E-15 | 2.25556E-15 | 34 |
| hsa05207 | Chemical carcinogenesis - receptor activation | 33/242 | 215/8846 | 3.21831E-16 | 8.3676E-15 | 3.20291E-15 | 33 |
| hsa05161 | Hepatitis B | 29/242 | 163/8846 | 4.06618E-16 | 9.69107E-15 | 3.7095E-15 | 29 |
| hsa05205 | Proteoglycans in cancer | 32/242 | 204/8846 | 4.93135E-16 | 1.0849E-14 | 4.15272E-15 | 32 |
| hsa04066 | HIF-1 signaling pathway | 24/242 | 109/8846 | 1.04525E-15 | 2.1353E-14 | 8.17338E-15 | 24 |
| hsa04148 | Efferocytosis | 28/242 | 157/8846 | 1.27083E-15 | 2.42304E-14 | 9.27479E-15 | 28 |
| hsa05145 | Toxoplasmosis | 24/242 | 111/8846 | 1.62534E-15 | 2.9053E-14 | 1.11207E-14 | 24 |
| hsa04625 | C-type lectin receptor signaling pathway | 23/242 | 105/8846 | 4.79806E-15 | 8.07203E-14 | 3.08977E-14 | 23 |
| hsa05418 | Fluid shear stress and atherosclerosis | 26/242 | 141/8846 | 6.08732E-15 | 9.07477E-14 | 3.4736E-14 | 26 |
| hsa05152 | Tuberculosis | 29/242 | 180/8846 | 6.27083E-15 | 9.07477E-14 | 3.4736E-14 | 29 |
| hsa04010 | MAPK signaling pathway | 37/242 | 300/8846 | 6.346E-15 | 9.07477E-14 | 3.4736E-14 | 37 |
| hsa04926 | Relaxin signaling pathway | 25/242 | 130/8846 | 7.48674E-15 | 1.01962E-13 | 3.90286E-14 | 25 |
| hsa04071 | Sphingolipid signaling pathway | 24/242 | 122/8846 | 1.5606E-14 | 2.02878E-13 | 7.76565E-14 | 24 |
| hsa05321 | Inflammatory bowel disease | 18/242 | 65/8846 | 6.21649E-14 | 7.65592E-13 | 2.9305E-13 | 18 |
| hsa04657 | IL-17 signaling pathway | 21/242 | 95/8846 | 6.42455E-14 | 7.65592E-13 | 2.9305E-13 | 21 |
| hsa04668 | TNF signaling pathway | 23/242 | 119/8846 | 8.44798E-14 | 9.66449E-13 | 3.69933E-13 | 23 |
| hsa05221 | Acute myeloid leukemia | 18/242 | 68/8846 | 1.47744E-13 | 1.62519E-12 | 6.22081E-13 | 18 |
| hsa05235 | PD-L1 expression and PD-1 checkpoint pathway in cancer | 20/242 | 90/8846 | 2.33994E-13 | 2.4786E-12 | 9.48746E-13 | 20 |
| hsa05171 | Coronavirus disease - COVID-19 | 31/242 | 238/8846 | 2.77849E-13 | 2.83803E-12 | 1.08633E-12 | 31 |
| hsa05162 | Measles | 24/242 | 139/8846 | 3.2468E-13 | 3.20202E-12 | 1.22565E-12 | 24 |
| hsa05210 | Colorectal cancer | 19/242 | 87/8846 | 1.32892E-12 | 1.26691E-11 | 4.84941E-12 | 19 |
| hsa05220 | Chronic myeloid leukemia | 18/242 | 77/8846 | 1.52313E-12 | 1.40521E-11 | 5.37879E-12 | 18 |
| hsa01522 | Endocrine resistance | 20/242 | 99/8846 | 1.581E-12 | 1.41302E-11 | 5.40868E-12 | 20 |
| hsa05219 | Bladder cancer | 14/242 | 41/8846 | 1.65224E-12 | 1.43194E-11 | 5.48111E-12 | 14 |
| hsa04370 | VEGF signaling pathway | 16/242 | 60/8846 | 3.07406E-12 | 2.58583E-11 | 9.89792E-12 | 16 |
| hsa05230 | Central carbon metabolism in cancer | 17/242 | 71/8846 | 4.27112E-12 | 3.49011E-11 | 1.33593E-11 | 17 |
| hsa04218 | Cellular senescence | 24/242 | 157/8846 | 5.03846E-12 | 4.00278E-11 | 1.53216E-11 | 24 |
| hsa04068 | FoxO signaling pathway | 22/242 | 133/8846 | 8.08123E-12 | 6.24657E-11 | 2.39103E-11 | 22 |
| hsa04014 | Ras signaling pathway | 29/242 | 238/8846 | 9.43676E-12 | 7.1024E-11 | 2.71862E-11 | 29 |
| hsa04210 | Apoptosis | 22/242 | 136/8846 | 1.28116E-11 | 9.39521E-11 | 3.59625E-11 | 22 |
| hsa05135 | Yersinia infection | 22/242 | 138/8846 | 1.72961E-11 | 1.21884E-10 | 4.6654E-11 | 22 |
| hsa05140 | Leishmaniasis | 17/242 | 77/8846 | 1.74728E-11 | 1.21884E-10 | 4.6654E-11 | 17 |
| hsa04015 | Rap1 signaling pathway | 27/242 | 212/8846 | 1.82869E-11 | 1.24525E-10 | 4.76651E-11 | 27 |
| hsa04664 | Fc epsilon RI signaling pathway | 16/242 | 69/8846 | 3.15604E-11 | 2.09913E-10 | 8.03495E-11 | 16 |
| hsa05160 | Hepatitis C | 23/242 | 159/8846 | 4.58854E-11 | 2.98255E-10 | 1.14165E-10 | 23 |
| hsa05166 | Human T-cell leukemia virus 1 infection | 27/242 | 223/8846 | 6.00752E-11 | 3.81812E-10 | 1.46148E-10 | 27 |
| hsa04931 | Insulin resistance | 19/242 | 109/8846 | 8.88966E-11 | 5.52705E-10 | 2.11562E-10 | 19 |
| hsa01523 | Antifolate resistance | 11/242 | 30/8846 | 1.7687E-10 | 1.07627E-09 | 4.11971E-10 | 11 |
| hsa05133 | Pertussis | 16/242 | 78/8846 | 2.27766E-10 | 1.35711E-09 | 5.19467E-10 | 16 |
| hsa04936 | Alcoholic liver disease | 21/242 | 144/8846 | 2.85537E-10 | 1.6666E-09 | 6.37934E-10 | 21 |
| hsa04080 | Neuroactive ligand-receptor interaction | 34/242 | 368/8846 | 3.17301E-10 | 1.81496E-09 | 6.94723E-10 | 34 |
| hsa05165 | Human papillomavirus infection | 32/242 | 333/8846 | 4.10665E-10 | 2.28689E-09 | 8.75366E-10 | 32 |
| hsa05222 | Small cell lung cancer | 17/242 | 93/8846 | 4.15799E-10 | 2.28689E-09 | 8.75366E-10 | 17 |
| hsa04062 | Chemokine signaling pathway | 24/242 | 193/8846 | 4.28397E-10 | 2.31173E-09 | 8.84873E-10 | 24 |
| hsa04917 | Prolactin signaling pathway | 15/242 | 71/8846 | 5.45551E-10 | 2.84162E-09 | 1.0877E-09 | 15 |
| hsa04072 | Phospholipase D signaling pathway | 21/242 | 149/8846 | 5.46466E-10 | 2.84162E-09 | 1.0877E-09 | 21 |
| hsa04660 | T cell receptor signaling pathway | 19/242 | 122/8846 | 6.64368E-10 | 3.39302E-09 | 1.29876E-09 | 19 |
| hsa05131 | Shigellosis | 27/242 | 249/8846 | 7.5221E-10 | 3.77425E-09 | 1.44469E-09 | 27 |
| hsa04510 | Focal adhesion | 24/242 | 203/8846 | 1.2196E-09 | 5.91196E-09 | 2.26295E-09 | 24 |
| hsa05169 | Epstein-Barr virus infection | 24/242 | 203/8846 | 1.2196E-09 | 5.91196E-09 | 2.26295E-09 | 24 |
| hsa05164 | Influenza A | 22/242 | 172/8846 | 1.38661E-09 | 6.60949E-09 | 2.52995E-09 | 22 |
| hsa04380 | Osteoclast differentiation | 20/242 | 142/8846 | 1.45136E-09 | 6.70155E-09 | 2.56519E-09 | 20 |
| hsa05203 | Viral carcinogenesis | 24/242 | 205/8846 | 1.49129E-09 | 6.70155E-09 | 2.56519E-09 | 24 |
| hsa05415 | Diabetic cardiomyopathy | 24/242 | 205/8846 | 1.49129E-09 | 6.70155E-09 | 2.56519E-09 | 24 |
| hsa05214 | Glioma | 15/242 | 76/8846 | 1.49965E-09 | 6.70155E-09 | 2.56519E-09 | 15 |
| hsa04621 | NOD-like receptor signaling pathway | 23/242 | 189/8846 | 1.55571E-09 | 6.84514E-09 | 2.62015E-09 | 23 |
| hsa04722 | Neurotrophin signaling pathway | 18/242 | 120/8846 | 3.54623E-09 | 1.5367E-08 | 5.88211E-09 | 18 |
| hsa05226 | Gastric cancer | 20/242 | 150/8846 | 3.86539E-09 | 1.65E-08 | 6.3158E-09 | 20 |
| hsa05132 | Salmonella infection | 26/242 | 251/8846 | 4.24088E-09 | 1.78367E-08 | 6.82743E-09 | 26 |
| hsa04920 | Adipocytokine signaling pathway | 14/242 | 70/8846 | 4.4683E-09 | 1.85208E-08 | 7.08929E-09 | 14 |
| hsa04620 | Toll-like receptor signaling pathway | 17/242 | 109/8846 | 5.32381E-09 | 2.16868E-08 | 8.30116E-09 | 17 |
| hsa05120 | Epithelial cell signaling in Helicobacter pylori infection | 14/242 | 71/8846 | 5.43178E-09 | 2.16868E-08 | 8.30116E-09 | 14 |
| hsa04020 | Calcium signaling pathway | 26/242 | 254/8846 | 5.45961E-09 | 2.16868E-08 | 8.30116E-09 | 26 |
| hsa05206 | MicroRNAs in cancer | 29/242 | 312/8846 | 6.30502E-09 | 2.44271E-08 | 9.35008E-09 | 29 |
| hsa05225 | Hepatocellular carcinoma | 21/242 | 170/8846 | 6.3203E-09 | 2.44271E-08 | 9.35008E-09 | 21 |
| hsa05218 | Melanoma | 14/242 | 73/8846 | 7.94605E-09 | 2.99022E-08 | 1.14458E-08 | 14 |
| hsa05223 | Non-small cell lung cancer | 14/242 | 73/8846 | 7.94605E-09 | 2.99022E-08 | 1.14458E-08 | 14 |
| hsa04932 | Non-alcoholic fatty liver disease | 20/242 | 157/8846 | 8.63085E-09 | 3.20574E-08 | 1.22708E-08 | 20 |
| hsa05231 | Choline metabolism in cancer | 16/242 | 99/8846 | 8.96806E-09 | 3.28829E-08 | 1.25867E-08 | 16 |
| hsa04024 | cAMP signaling pathway | 24/242 | 226/8846 | 1.0645E-08 | 3.80558E-08 | 1.45668E-08 | 24 |
| hsa05208 | Chemical carcinogenesis - reactive oxygen species | 24/242 | 226/8846 | 1.0645E-08 | 3.80558E-08 | 1.45668E-08 | 24 |
| hsa04613 | Neutrophil extracellular trap formation | 22/242 | 192/8846 | 1.11565E-08 | 3.9392E-08 | 1.50783E-08 | 22 |
| hsa04919 | Thyroid hormone signaling pathway | 17/242 | 122/8846 | 3.0493E-08 | 1.06354E-07 | 4.07095E-08 | 17 |
| hsa04371 | Apelin signaling pathway | 18/242 | 140/8846 | 4.26436E-08 | 1.46941E-07 | 5.62452E-08 | 18 |
| hsa05202 | Transcriptional misregulation in cancer | 21/242 | 193/8846 | 6.07735E-08 | 2.06919E-07 | 7.92036E-08 | 21 |
| hsa04012 | ErbB signaling pathway | 14/242 | 86/8846 | 7.10577E-08 | 2.39088E-07 | 9.15171E-08 | 14 |
| hsa05170 | Human immunodeficiency virus 1 infection | 22/242 | 213/8846 | 7.45639E-08 | 2.47968E-07 | 9.49162E-08 | 22 |
| hsa04726 | Serotonergic synapse | 16/242 | 115/8846 | 8.0419E-08 | 2.64366E-07 | 1.01193E-07 | 16 |
| hsa04064 | NF-kappa B signaling pathway | 15/242 | 105/8846 | 1.44859E-07 | 4.68264E-07 | 1.7924E-07 | 15 |
| hsa05130 | Pathogenic Escherichia coli infection | 21/242 | 203/8846 | 1.45718E-07 | 4.68264E-07 | 1.7924E-07 | 21 |
| hsa05323 | Rheumatoid arthritis | 14/242 | 94/8846 | 2.24562E-07 | 7.13608E-07 | 2.73151E-07 | 14 |
| hsa04611 | Platelet activation | 16/242 | 126/8846 | 2.93007E-07 | 9.2088E-07 | 3.5249E-07 | 16 |
| hsa04550 | Signaling pathways regulating pluripotency of stem cells | 17/242 | 144/8846 | 3.59556E-07 | 1.11775E-06 | 4.27847E-07 | 17 |
| hsa04750 | Inflammatory mediator regulation of TRP channels | 14/242 | 99/8846 | 4.33526E-07 | 1.33321E-06 | 5.10319E-07 | 14 |
| hsa05143 | African trypanosomiasis | 9/242 | 37/8846 | 4.7142E-07 | 1.43432E-06 | 5.49023E-07 | 9 |
| hsa05224 | Breast cancer | 17/242 | 148/8846 | 5.34126E-07 | 1.608E-06 | 6.15502E-07 | 17 |
| hsa04630 | JAK-STAT signaling pathway | 18/242 | 168/8846 | 6.98116E-07 | 2.0798E-06 | 7.96097E-07 | 18 |
| hsa05144 | Malaria | 10/242 | 50/8846 | 7.65529E-07 | 2.25713E-06 | 8.63972E-07 | 10 |
| hsa04662 | B cell receptor signaling pathway | 13/242 | 91/8846 | 1.00351E-06 | 2.92862E-06 | 1.121E-06 | 13 |
| hsa04935 | Growth hormone synthesis, secretion and action | 15/242 | 122/8846 | 1.0587E-06 | 3.05848E-06 | 1.17071E-06 | 15 |
| hsa04915 | Estrogen signaling pathway | 16/242 | 139/8846 | 1.13094E-06 | 3.22982E-06 | 1.23629E-06 | 16 |
| hsa04658 | Th1 and Th2 cell differentiation | 13/242 | 92/8846 | 1.1406E-06 | 3.22982E-06 | 1.23629E-06 | 13 |
| hsa04217 | Necroptosis | 17/242 | 159/8846 | 1.47942E-06 | 4.14818E-06 | 1.58782E-06 | 17 |
| hsa05134 | Legionellosis | 10/242 | 56/8846 | 2.29719E-06 | 6.37861E-06 | 2.44157E-06 | 10 |
| hsa05211 | Renal cell carcinoma | 11/242 | 70/8846 | 2.66306E-06 | 7.3234E-06 | 2.80322E-06 | 11 |
| hsa04928 | Parathyroid hormone synthesis, secretion and action | 14/242 | 115/8846 | 2.75109E-06 | 7.49345E-06 | 2.86831E-06 | 14 |
| hsa05146 | Amoebiasis | 13/242 | 103/8846 | 4.1862E-06 | 1.12948E-05 | 4.32338E-06 | 13 |
| hsa04912 | GnRH signaling pathway | 12/242 | 93/8846 | 7.82685E-06 | 2.09204E-05 | 8.0078E-06 | 12 |
| hsa04666 | Fc gamma R-mediated phagocytosis | 12/242 | 98/8846 | 1.35233E-05 | 3.58118E-05 | 1.37078E-05 | 12 |
| hsa04725 | Cholinergic synapse | 13/242 | 115/8846 | 1.42806E-05 | 3.74701E-05 | 1.43426E-05 | 13 |
| hsa04140 | Autophagy - animal | 16/242 | 169/8846 | 1.46243E-05 | 3.80231E-05 | 1.45543E-05 | 16 |
| hsa04910 | Insulin signaling pathway | 14/242 | 138/8846 | 2.32759E-05 | 5.99721E-05 | 2.29558E-05 | 14 |
| hsa04614 | Renin-angiotensin system | 6/242 | 23/8846 | 2.69006E-05 | 6.86926E-05 | 2.62938E-05 | 6 |
| hsa05213 | Endometrial cancer | 9/242 | 59/8846 | 2.81685E-05 | 7.12936E-05 | 2.72894E-05 | 9 |
| hsa04730 | Long-term depression | 9/242 | 60/8846 | 3.23596E-05 | 8.11829E-05 | 3.10748E-05 | 9 |
| hsa04115 | p53 signaling pathway | 10/242 | 75/8846 | 3.39002E-05 | 8.43083E-05 | 3.22711E-05 | 10 |
| hsa04930 | Type II diabetes mellitus | 8/242 | 47/8846 | 3.49142E-05 | 8.60816E-05 | 3.29499E-05 | 8 |
| hsa03320 | PPAR signaling pathway | 10/242 | 76/8846 | 3.81126E-05 | 9.31641E-05 | 3.56609E-05 | 10 |
| hsa04540 | Gap junction | 11/242 | 92/8846 | 3.89278E-05 | 9.43504E-05 | 3.6115E-05 | 11 |
| hsa04213 | Longevity regulating pathway - multiple species | 9/242 | 62/8846 | 4.2342E-05 | 0.000101763 | 3.89524E-05 | 9 |
| hsa04520 | Adherens junction | 11/242 | 93/8846 | 4.30998E-05 | 0.000102721 | 3.93192E-05 | 11 |
| hsa04914 | Progesterone-mediated oocyte maturation | 12/242 | 111/8846 | 4.7949E-05 | 0.000113334 | 4.33815E-05 | 12 |
| hsa05216 | Thyroid cancer | 7/242 | 37/8846 | 5.36756E-05 | 0.00012583 | 4.81645E-05 | 7 |
| hsa05010 | Alzheimer disease | 25/242 | 391/8846 | 6.42707E-05 | 0.000149442 | 5.72028E-05 | 25 |
| hsa04670 | Leukocyte transendothelial migration | 12/242 | 116/8846 | 7.41146E-05 | 0.000170942 | 6.54323E-05 | 12 |
| hsa04921 | Oxytocin signaling pathway | 14/242 | 154/8846 | 7.88586E-05 | 0.000180429 | 6.90635E-05 | 14 |
| hsa04061 | Viral protein interaction with cytokine and cytokine receptor | 11/242 | 100/8846 | 8.46122E-05 | 0.000192056 | 7.35144E-05 | 11 |
| hsa04150 | mTOR signaling pathway | 14/242 | 158/8846 | 0.00010411 | 0.000234452 | 8.97424E-05 | 14 |
| hsa04211 | Longevity regulating pathway | 10/242 | 90/8846 | 0.000163402 | 0.000365101 | 0.000139751 | 10 |
| hsa04810 | Regulation of actin cytoskeleton | 17/242 | 230/8846 | 0.000184204 | 0.00040839 | 0.000156322 | 17 |
| hsa01524 | Platinum drug resistance | 9/242 | 75/8846 | 0.00019247 | 0.000423433 | 0.00016208 | 9 |
| hsa04215 | Apoptosis - multiple species | 6/242 | 32/8846 | 0.000196428 | 0.000428843 | 0.00016415 | 6 |
| hsa00590 | Arachidonic acid metabolism | 8/242 | 61/8846 | 0.000235091 | 0.000509363 | 0.000194972 | 8 |
| hsa04913 | Ovarian steroidogenesis | 7/242 | 51/8846 | 0.000435785 | 0.000937101 | 0.000358699 | 7 |
| hsa04152 | AMPK signaling pathway | 11/242 | 122/8846 | 0.000494371 | 0.00105515 | 0.000403885 | 11 |
| hsa04022 | cGMP-PKG signaling pathway | 13/242 | 166/8846 | 0.000613037 | 0.001298731 | 0.000497122 | 13 |
| hsa04610 | Complement and coagulation cascades | 9/242 | 88/8846 | 0.000643437 | 0.001353111 | 0.000517937 | 9 |
| hsa05204 | Chemical carcinogenesis - DNA adducts | 8/242 | 71/8846 | 0.000671574 | 0.001401972 | 0.00053664 | 8 |
| hsa05022 | Pathways of neurodegeneration - multiple diseases | 26/242 | 483/8846 | 0.000704723 | 0.001460514 | 0.000559048 | 26 |
| hsa04350 | TGF-beta signaling pathway | 10/242 | 108/8846 | 0.000719923 | 0.001481281 | 0.000566998 | 10 |
| hsa04650 | Natural killer cell mediated cytotoxicity | 11/242 | 135/8846 | 0.001154922 | 0.002359342 | 0.000903097 | 11 |
| hsa00591 | Linoleic acid metabolism | 5/242 | 30/8846 | 0.00119687 | 0.002427693 | 0.00092926 | 5 |
| hsa04612 | Antigen processing and presentation | 8/242 | 80/8846 | 0.00148208 | 0.002985034 | 0.001142597 | 8 |
| hsa04640 | Hematopoietic cell lineage | 9/242 | 99/8846 | 0.001503264 | 0.003006527 | 0.001150824 | 9 |
| hsa04360 | Axon guidance | 13/242 | 184/8846 | 0.001589122 | 0.003156172 | 0.001208104 | 13 |
| hsa04929 | GnRH secretion | 7/242 | 65/8846 | 0.001895136 | 0.003737992 | 0.00143081 | 7 |
| hsa04672 | Intestinal immune network for IgA production | 6/242 | 49/8846 | 0.002056994 | 0.004029455 | 0.001542375 | 6 |
| hsa04934 | Cushing syndrome | 11/242 | 155/8846 | 0.003460921 | 0.006733492 | 0.002577413 | 11 |
| hsa04270 | Vascular smooth muscle contraction | 10/242 | 134/8846 | 0.003656086 | 0.007065138 | 0.002704359 | 10 |
| hsa00380 | Tryptophan metabolism | 5/242 | 42/8846 | 0.005475683 | 0.010510371 | 0.004023109 | 5 |
| hsa04916 | Melanogenesis | 8/242 | 101/8846 | 0.006334238 | 0.01207728 | 0.004622882 | 8 |
| hsa00140 | Steroid hormone biosynthesis | 6/242 | 62/8846 | 0.006737888 | 0.012761828 | 0.00488491 | 6 |
| hsa04623 | Cytosolic DNA-sensing pathway | 7/242 | 83/8846 | 0.007470925 | 0.014057135 | 0.005380722 | 7 |
| hsa04060 | Cytokine-cytokine receptor interaction | 16/242 | 298/8846 | 0.007677506 | 0.014351417 | 0.005493365 | 16 |
| hsa04137 | Mitophagy - animal | 8/242 | 105/8846 | 0.007964451 | 0.014791124 | 0.005661674 | 8 |
| hsa00230 | Purine metabolism | 9/242 | 128/8846 | 0.008374173 | 0.0154517 | 0.005914526 | 9 |
| hsa04922 | Glucagon signaling pathway | 8/242 | 107/8846 | 0.008889032 | 0.016296558 | 0.006237917 | 8 |
| hsa04261 | Adrenergic signaling in cardiomyocytes | 10/242 | 154/8846 | 0.009590011 | 0.017469701 | 0.006686967 | 10 |
| hsa04720 | Long-term potentiation | 6/242 | 67/8846 | 0.00977318 | 0.017690693 | 0.006771557 | 6 |
| hsa05030 | Cocaine addiction | 5/242 | 49/8846 | 0.01052091 | 0.018924404 | 0.007243791 | 5 |
| hsa04924 | Renin secretion | 6/242 | 69/8846 | 0.01122377 | 0.020062488 | 0.007679421 | 6 |
| hsa04110 | Cell cycle | 10/242 | 158/8846 | 0.011366416 | 0.020191273 | 0.007728717 | 10 |
| hsa04976 | Bile secretion | 7/242 | 90/8846 | 0.011454909 | 0.020222863 | 0.007740809 | 7 |
| hsa05032 | Morphine addiction | 7/242 | 91/8846 | 0.012129379 | 0.021282224 | 0.008146306 | 7 |
| hsa04622 | RIG-I-like receptor signaling pathway | 6/242 | 72/8846 | 0.013675664 | 0.023849024 | 0.009128813 | 6 |
| hsa05410 | Hypertrophic cardiomyopathy | 7/242 | 99/8846 | 0.018592283 | 0.032226624 | 0.01233555 | 7 |
| hsa00760 | Nicotinate and nicotinamide metabolism | 4/242 | 38/8846 | 0.019460049 | 0.033268578 | 0.012734384 | 4 |
| hsa04960 | Aldosterone-regulated sodium reabsorption | 4/242 | 38/8846 | 0.019460049 | 0.033268578 | 0.012734384 | 4 |
| hsa05150 | Staphylococcus aureus infection | 7/242 | 100/8846 | 0.019542382 | 0.033268578 | 0.012734384 | 7 |
| hsa05020 | Prion disease | 14/242 | 278/8846 | 0.020362114 | 0.034458963 | 0.013190034 | 14 |
| hsa04310 | Wnt signaling pathway | 10/242 | 174/8846 | 0.021047255 | 0.035408911 | 0.01355365 | 10 |
| hsa04923 | Regulation of lipolysis in adipocytes | 5/242 | 59/8846 | 0.02219286 | 0.037117883 | 0.014207802 | 5 |
| hsa00983 | Drug metabolism - other enzymes | 6/242 | 81/8846 | 0.023228191 | 0.03862362 | 0.014784161 | 6 |
| hsa00220 | Arginine biosynthesis | 3/242 | 23/8846 | 0.023909257 | 0.039526286 | 0.015129679 | 3 |
| hsa04390 | Hippo signaling pathway | 9/242 | 157/8846 | 0.028271013 | 0.046468446 | 0.017786965 | 9 |
| hsa01232 | Nucleotide metabolism | 6/242 | 85/8846 | 0.028634189 | 0.046796446 | 0.017912515 | 6 |
| hsa05332 | Graft-versus-host disease | 4/242 | 44/8846 | 0.031544397 | 0.051259646 | 0.019620917 | 4 |
| hsa00790 | Folate biosynthesis | 3/242 | 27/8846 | 0.036471151 | 0.058930786 | 0.022557239 | 3 |
| hsa00830 | Retinol metabolism | 5/242 | 68/8846 | 0.038003743 | 0.061062194 | 0.023373089 | 5 |
| hsa05031 | Amphetamine addiction | 5/242 | 69/8846 | 0.040095929 | 0.064063886 | 0.024522062 | 5 |
| hsa04141 | Protein processing in endoplasmic reticulum | 9/242 | 170/8846 | 0.043618218 | 0.069303707 | 0.026527735 | 9 |
| hsa04144 | Endocytosis | 12/242 | 252/8846 | 0.043860039 | 0.069303707 | 0.026527735 | 12 |
| hsa00330 | Arginine and proline metabolism | 4/242 | 50/8846 | 0.047206609 | 0.074181814 | 0.028394953 | 4 |
